# Supplementary material for: 5′-Terminal nucleotide variations in human cytoplasmic tRNAHisGUG and its 5′-halves
Source: PubMed Central journal article supplement — RNA. 2017 Feb;23(2):161–8. doi: 10.1261/rna.058024.116 (PMC5238791; doi:10.1261/rna.058024.116), 2017-02
Supplement: supp_058024.116_SuppMaterial.pdf [file supp_058024.116_SuppMaterial.pdf]

## Supplementary Information

### Supplementary Figure Legends

#### Figure S1. Sequences of human cyto tRNA<sup>HisGUG</sup> genes

Eleven cyto tRNA<sup>HisGUG</sup> genes reported in the Genomic tRNA Database are shown. Upper case black letters designate the regions of mature tRNA<sup>HisGUG</sup>. The nine genes from the top encode the identical “major” isodecoder on which this study focused. Sequences targeted by primers and the TaqMan probe in our TaqMan qRT-PCR analysis are indicated.

#### Figure S2. Primer extension using dideoxynucleotides

Synthetic tRNA<sup>HisGUG</sup> harboring G<sub>-1</sub> with *E. coli* tRNA carrier (left) and 70–90 nt mature tRNA fractions of BT-474 cells (right) were subjected to the primer extension assay using the indicated combinations of deoxy- and dideoxynucleotides. In dideoxynucleotide-containing reaction, 100 μM of either ddCTP or ddGTP was mixed with 10 μM dCTP, 50 μM dGTP, 50 μM dATP, or 50 μM dCTP, 10 μM dGTP, 50 μM dATP, respectively. The presence of ddCTP or ddGTP yielded 22- and 25-nt bands (shown with white squares) or 23- and 24-nt bands (shown with black squares), respectively, indicating that the reverse transcription was correctly run on “GCCG” sequences of tRNA<sup>HisGUG</sup> in both synthetic tRNA and cellular tRNA samples.

#### Figure S3. Quantification of the bands yielded by the primer extension assay for 5'-SHOT-RNA<sup>HisGUG</sup>

Three independent primer extension assays for an equal mixture of synthetic mature tRNA<sup>HisGUG</sup> starting from G<sub>1</sub> and G<sub>-1</sub>, or for a 30–50 nt small RNA fraction of BT-474 cells

were performed (one of the results are shown in **Fig. 2B**) and the intensities of the resultant 25- and 26-nt bands were quantified. The relative band intensities with SD bars are shown.

**Figure S4. Schematics and sequences of the AS-disruptor, adapter, TaqMan probe, and primers for the TaqMan qRT-PCR method**

The 5'-adaptor comprised DNA except for the last three 3'-terminal nucleotides, which were designed as RNA.

**Figure S5. Proportional correlation of synthetic tRNA input with Ct values obtained using the TaqMan qRT-PCR method**

Synthetic tRNA<sup>HisGUG</sup> containing either 5'-terminal G<sub>-1</sub>, U<sub>-1</sub>, C<sub>-1</sub>, A<sub>-1</sub>, and G<sub>1</sub> was mixed with the *E. coli* tRNA fraction and used as a template. Each data set represents the average of three independent experiments with bars showing the SD.

chr1.tRNA111 cctgtggctcGCCGTGATCGTATAGTGGTTAGTACTCTGCGTTGTGGCCGCAGCAACCTCGGTTCAATCCGAGTCACGGCAatgtcgttag  
 chr1.tRNA118 ttagtggctcGCCGTGATCGTATAGTGGTTAGTACTCTGCGTTGTGGCCGCAGCAACCTCGGTTCAATCCGAGTCACGGCAagggtgttota  
 chr1.tRNA16 cttgtggcccGCCGTGATCGTATAGTGGTTAGTACTCTGCGTTGTGGCCGCAGCAACCTCGGTTCAATCCGAGTCACGGCAaagttgctcg  
 chr1.tRNA21 cctgtggctcGCCGTGATCGTATAGTGGTTAGTACTCTGCGTTGTGGCCGCAGCAACCTCGGTTCAATCCGAGTCACGGCAatgtcgttag  
 chr15.tRNA1 ccggtagctcGCCGTGATCGTATAGTGGTTAGTACTCTGCGTTGTGGCCGCAGCAACCTCGGTTCAATCCGAGTCACGGCAattgtggaac  
 chr15.tRNA8 ctagtagctcGCCGTGATCGTATAGTGGTTAGTACTCTGCGTTGTGGCCGCAGCAACCTCGGTTCAATCCGAGTCACGGCAattgtgaggac  
 chr15.tRNA9 ccggtagctcGCCGTGATCGTATAGTGGTTAGTACTCTGCGTTGTGGCCGCAGCAACCTCGGTTCAATCCGAGTCACGGCAattgtgggaac  
 chr6.tRNA33 ctggtggcgtGCCGTGATCGTATAGTGGTTAGTACTCTGCGTTGTGGCCGCAGCAACCTCGGTTCAATCCGAGTCACGGCAgtaccttgat  
 chr9.tRNA7 tcagtagcttGCCGTGATCGTATAGTGGTTAGTACTCTGCGTTGTGGCCGCAGCAACCTCGGTTCAATCCGAGTCACGGCAaggaggggaga  
 chr3.tRNA4 ccagtagcatGCAGTGACTGTATAGTGGTTAGTACTCTGCGTTGTGGCCGCAGCAACCTCGGTTCAATCCGAGTCACGGCAattgtgggaac  
 chr1.tRNA106 cctgtggctcGCCGTGATCGTATAGTGGTTAGTACTCTGCGTTGTGGCCGCAGCAACCTCGGTTCAATCCGAGTCACGGCAatgtcgttct

TaqMan probe hybridizing region
RT primer  
PCR Rv primer

*Shigematsu and Kirino, Supplementary Figure S1*

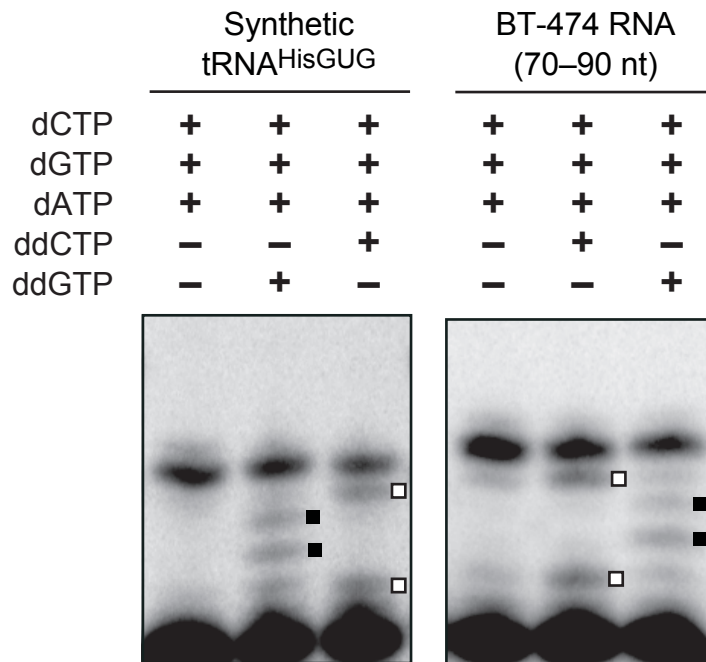

*Shigematsu and Kirino, Supplementary Figure S2*

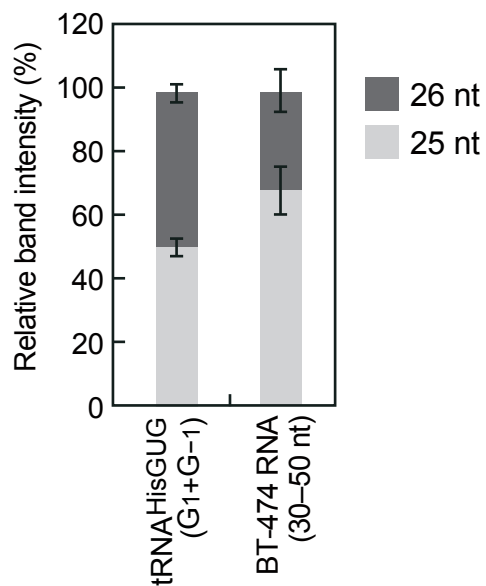

*Shigematsu and Kirino, Supplementary Figure S3*

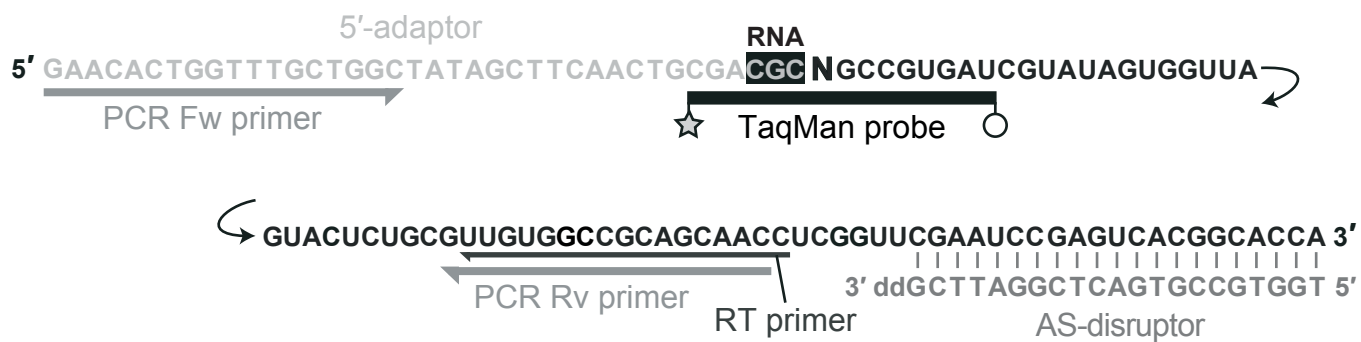

*Shigematsu and Kirino, Supplementary Figure S4*

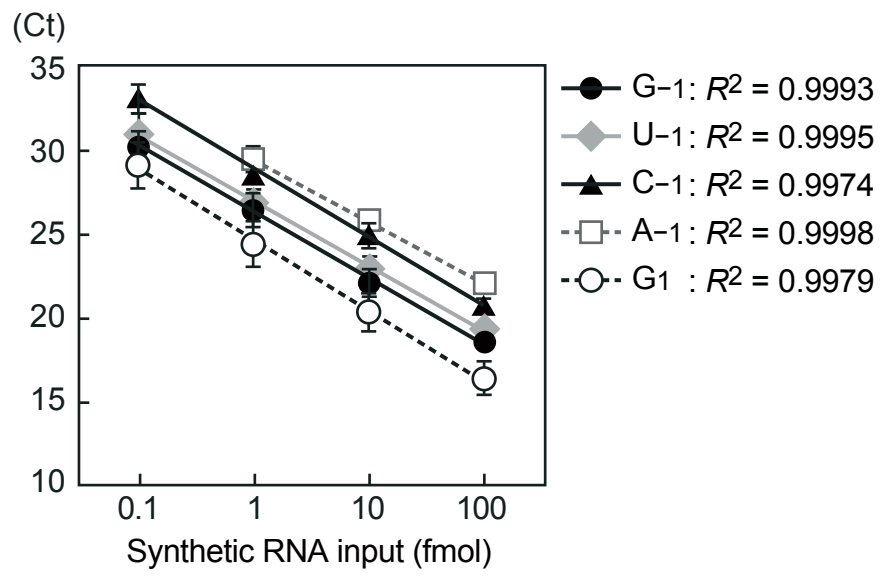

*Shigematsu and Kirino, Supplementary Figure S5*

## Supplementary Tables

**Table S1. Validation of the specificity of our TaqMan qRT-PCR method**

| Template        |          | TaqMan probe    |                 |                 |                 |                |
|-----------------|----------|-----------------|-----------------|-----------------|-----------------|----------------|
| 5'-end          | Amount   | G <sub>-1</sub> | U <sub>-1</sub> | C <sub>-1</sub> | A <sub>-1</sub> | G <sub>1</sub> |
| G <sub>-1</sub> | 1 fmol   | 9.76 ± 0.02     | N. D.           | N. D.           | N. D.           | N. D.          |
|                 | 0.1 amol | 26.90 ± 0.30    | N. D.           | N. D.           | N. D.           | N. D.          |
| U <sub>-1</sub> | 1 fmol   | N. D.           | 11.83 ± 0.15    | N. D.           | N. D.           | N. D.          |
|                 | 0.1 amol | N. D.           | 25.02 ± 0.04    | N. D.           | N. D.           | N. D.          |
| C <sub>-1</sub> | 1 fmol   | N. D.           | N. D.           | 10.00 ± 0.06    | N. D.           | N. D.          |
|                 | 0.1 amol | N. D.           | N. D.           | 23.93 ± 0.12    | N. D.           | N. D.          |
| A <sub>-1</sub> | 1 fmol   | N. D.           | N. D.           | N. D.           | 12.00 ± 0.09    | N. D.          |
|                 | 0.1 amol | N. D.           | N. D.           | N. D.           | 25.66 ± 0.10    | N. D.          |
| G <sub>1</sub>  | 1 fmol   | N. D.           | N. D.           | N. D.           | N. D.           | 10.44 ± 0.10   |
|                 | 0.1 amol | N. D.           | N. D.           | N. D.           | N. D.           | 23.10 ± 0.03   |

A TaqMan qPCR method targeting 5'-terminal G<sub>-1</sub>, U<sub>-1</sub>, C<sub>-1</sub>, A<sub>-1</sub>, or G<sub>1</sub> was applied to plasmid DNA templates containing sequences of the ligation product of the 5'-adaptor and respective 5'-terminal variant of tRNA<sup>HisGUG</sup>. Amplification signals were produced only when the TaqMan probe matched with its targeted template.

**Table S2. Mature cyto tRNA<sup>HisGUG</sup> sequences present in the HEK293T tRNA sequence library**

| File name  | Sample name    |      | Total    | Mapped to tRNA <sup>HisGUG</sup> | Full length mature tRNA <sup>HisGUG</sup> |
|------------|----------------|------|----------|----------------------------------|-------------------------------------------|
| SRR1836125 | tRNA treated 1 | Read | 19182690 | 346179                           | 5073                                      |
|            |                | %    | 100.00   | 1.80                             | 0.03                                      |
|            |                | %    | –        | 100.00                           | 1.47                                      |
| SRR1836125 | tRNA treated 2 | Read | 8664537  | 157491                           | 1932                                      |
|            |                | %    | 100.00   | 1.82                             | 0.02                                      |
|            |                | %    | –        | 100.00                           | 1.23                                      |

SRR files were obtained from the Sequence Read Archive (SRA) as indicated in (Zheng et al. 2015). Raw reads of the two indicated samples (HEK293T tRNA library obtained after AlkB treatment) were mapped to human cyto tRNA<sup>HisGUG</sup> using Bowtie (two allowed mismatches). Among the mapped reads, mature tRNA sequences containing 3'-terminal CCA sequences with lengths of either 76 or 75 nt were extracted.

**Table S3. 5'-terminal nucleotides of mature cyto tRNA<sup>HisGUG</sup> in the HEK293T tRNA sequence library**

| File name  | Sample name    |      | Full length tRNA <sup>HisGUG</sup> | Nucleotide of 5'-end |                 |                 |                 |                |
|------------|----------------|------|------------------------------------|----------------------|-----------------|-----------------|-----------------|----------------|
|            |                |      |                                    | G <sub>-1</sub>      | U <sub>-1</sub> | C <sub>-1</sub> | A <sub>-1</sub> | G <sub>1</sub> |
| SRR1836125 | tRNA treated 1 | Read | 5073                               | 2381                 | 909             | 112             | 132             | 1539           |
|            |                | %    | 100.00                             | 46.93                | 17.92           | 2.21            | 2.60            | 30.34          |
| SRR1836125 | tRNA treated 2 | Read | 1932                               | 927                  | 331             | 47              | 63              | 564            |
|            |                | %    | 100.00                             | 47.98                | 17.13           | 2.43            | 3.26            | 29.19          |

**Table S4. Sequences of oligo DNA/RNA used in this study**

| Name                             | Sequence (5' to 3')                         |
|----------------------------------|---------------------------------------------|
| AS-disruptor                     | TGGTGCCGTGACTCGGATTCddG                     |
| 5'-adaptor                       | GAACACTGCGTTTGTCTGGCTATAGCTTCAACTGCGArCrGrC |
| RT primer                        | GGTTGCTGCGGCCACAA                           |
| PCR forward primer               | GAACACTGCGTTTGTCTGGC                        |
| PCR reverse primer               | GTTGCTGCGGCCACAAC                           |
| TaqMan probe for G <sub>-1</sub> | CGACGCGCCGTGAT                              |
| TaqMan probe for U <sub>-1</sub> | CGACGCTGCCGTGAT                             |
| TaqMan probe for C <sub>-1</sub> | CGACGCCGCCGTGAT                             |
| TaqMan probe for A <sub>-1</sub> | CGACGCAGCCGTGAT                             |
| TaqMan probe for G <sub>1</sub>  | CGACGCGCCGTGAT                              |

TaqMan probes contain 6-carboxyfluorescein (FAM) and ZEN/Iowa Black as the fluorophore and quencher, respectively. The 5'-adaptor comprised DNA except for the last three 3'-terminal nucleotides, which were designed as RNA.
